# Supplementary material for: Characterization and Potential Action Mode Divergences of Homologous ACO1 Genes during the Organ Development and Ripening Process between Non-Climacteric Grape and Climacteric Peach
Source: MDPI journal article supplement (doi:10.3390/ijms25020789), 2024-01-08
Supplement: s1 [file s1]

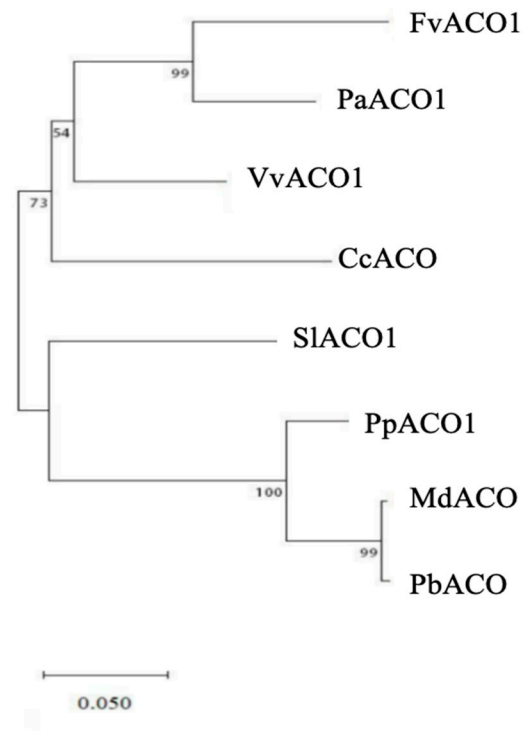

**Figure S1.** The phylogenetic tree of homologous ACO1 across 8 plant species (by the Neighbor-Joining method).
