# Supplementary figures and images for: Characterization and Potential Action Mode Divergences of Homologous ACO1 Genes during the Organ Development and Ripening Process between Non-Climacteric Grape and Climacteric Peach
Source: MDPI journal article supplement (doi:10.3390/ijms25020789), 2024-01-08

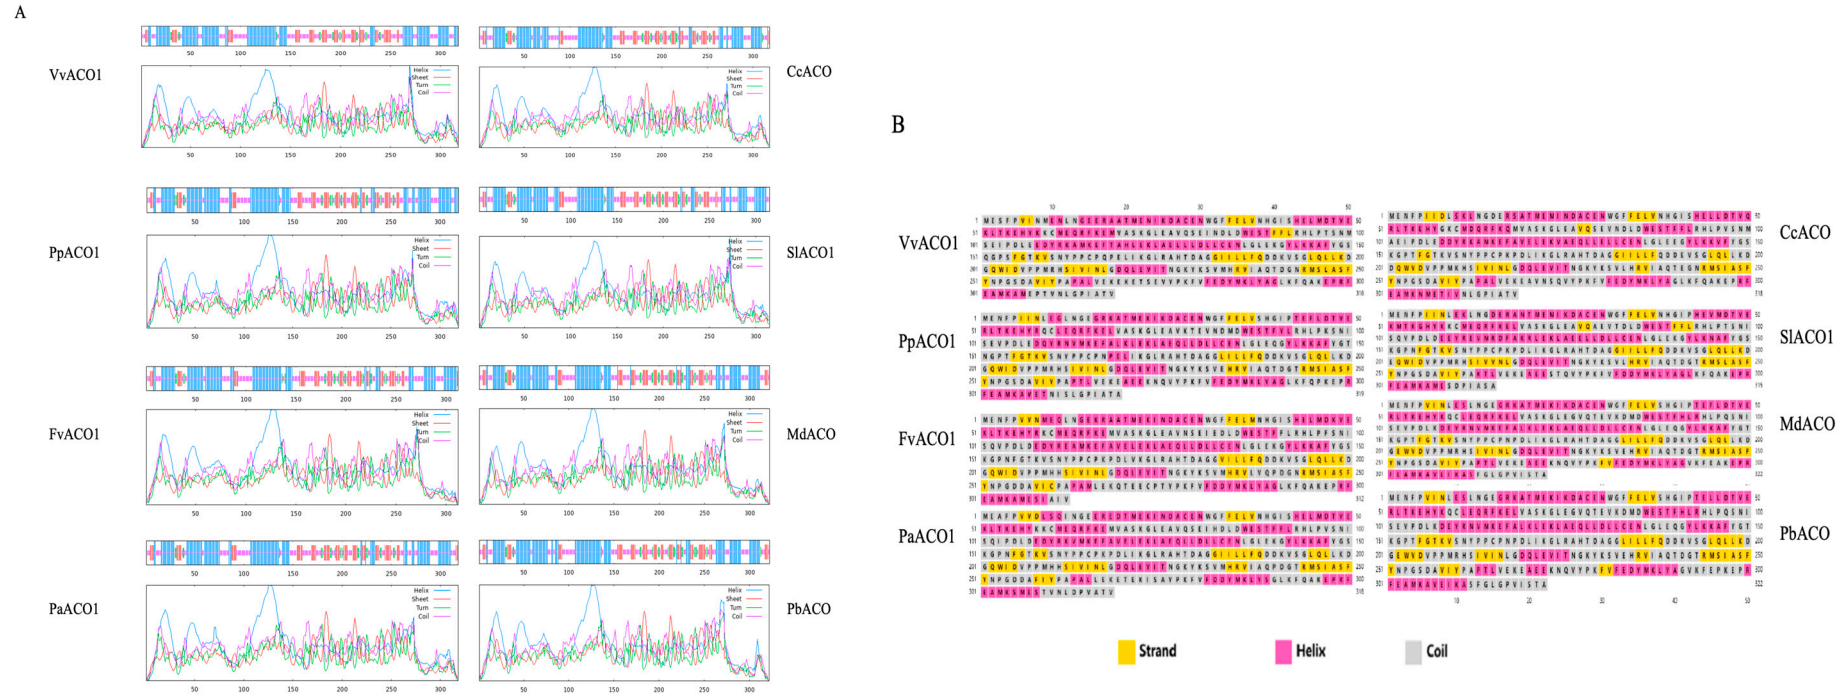

Supplement: s1 [file s1]
